# Supplementary material
Source: PubMed Central journal article supplement (PMC9233037)
Supplement: NIHMS1802508-supplement-Supplemental_Table_Driving_Avoidance_Classes.pdf [file NIHMS1802508-supplement-Supplemental_Table_Driving_Avoidance_Classes.pdf]

**Supplemental Table.** Identification of Optimal Number of Driving Avoidance Latent Classes<sup>a</sup> Using Ten Driving Indicators<sup>b</sup>, ConsumerStyles 2015, United States, Sample N=1,198.

| Number of Classes | G-Squared | AIC     | BIC     |
|-------------------|-----------|---------|---------|
| 2                 | 4031.98   | 4113.98 | 4322.60 |
| 3                 | 3135.84   | 3259.84 | 3575.32 |
| 4 <sup>c</sup>    | 2822.71   | 2988.71 | 3411.05 |
| 5                 | 2751.25   | 2959.25 | 3488.45 |

*Note.* AIC=Akaike Information Criterion. BIC=Bayesian Information Criterion.

<sup>a</sup> Optimal number of latent classes was determined using a balance of fit, parsimony, and interpretability using the deviance statistic G-Squared, the AIC, and the BIC to assess model fit.

<sup>b</sup> Driving indicators used were current driving frequency and frequency of avoiding driving at night, highway driving, making left turns across oncoming traffic, driving in bad weather, driving alone, driving on high traffic roads, driving in unfamiliar areas, driving during rush hour, and driving long distances.

<sup>c</sup> Optimal number of classes.
